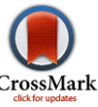

# The Response to High CO<sub>2</sub> Levels Requires the Neuropeptide Secretion Component HID-1 to Promote Pumping Inhibition

Kfir Sharabi<sup>1</sup>, Chayki Charar<sup>1</sup>, Nurit Friedman<sup>1</sup>, Inbar Mizrahi<sup>1</sup>, Alon Zaslaver<sup>1</sup>, Jacob I. Sznajder<sup>2</sup>, Yosef Gruenbaum<sup>1\*</sup>

**1** Department of Genetics, Institute of Life Sciences, Hebrew University of Jerusalem, Jerusalem, Israel, **2** Division of Pulmonary and Critical Care Medicine, Feinberg School of Medicine, Northwestern University, Chicago, Illinois, United States of America

## Abstract

Carbon dioxide (CO<sub>2</sub>) is a key molecule in many biological processes; however, mechanisms by which organisms sense and respond to high CO<sub>2</sub> levels remain largely unknown. Here we report that acute CO<sub>2</sub> exposure leads to a rapid cessation in the contraction of the pharynx muscles in *Caenorhabditis elegans*. To uncover the molecular mechanisms underlying this response, we performed a forward genetic screen and found that *hid-1*, a key component in neuropeptide signaling, regulates this inhibition in muscle contraction. Surprisingly, we found that this *hid-1*-mediated pathway is independent of any previously known pathways controlling CO<sub>2</sub> avoidance and oxygen sensing. In addition, animals with mutations in *unc-31* and *egl-21* (neuropeptide secretion and maturation components) show impaired inhibition of muscle contraction following acute exposure to high CO<sub>2</sub> levels, in further support of our findings. Interestingly, the observed response in the pharynx muscle requires the BAG neurons, which also mediate CO<sub>2</sub> avoidance. This novel *hid-1*-mediated pathway sheds new light on the physiological effects of high CO<sub>2</sub> levels on animals at the organism-wide level.

**Citation:** Sharabi K, Charar C, Friedman N, Mizrahi I, Zaslaver A, et al. (2014) The Response to High CO<sub>2</sub> Levels Requires the Neuropeptide Secretion Component HID-1 to Promote Pumping Inhibition. *PLoS Genet* 10(8): e1004529. doi:10.1371/journal.pgen.1004529

**Editor:** Michael Ailion, University of Washington, United States of America

**Received:** July 25, 2013; **Accepted:** June 9, 2014; **Published:** August 7, 2014

**Copyright:** © 2014 Sharabi et al. This is an open-access article distributed under the terms of the Creative Commons Attribution License, which permits unrestricted use, distribution, and reproduction in any medium, provided the original author and source are credited.

**Funding:** This work was supported by the Arian Solis Ostrosky and Sydney Dwyer Davis foundation to YG and the NIH R01-HL85534 to JIS and YG. Funding was also received from the European Research Council under the European Union's Seventh Framework Programme (FP/2007-2013)/ERC Grant N° 336803 to AZ. The funders had no role in study design, data collection and analysis, decision to publish, or preparation of the manuscript.

**Competing Interests:** The authors have declared that no competing interests exist.

\* Email: gru@vms.huji.ac.il

## Introduction

One of the fundamental features shared by most, if not all, living organisms is the ability to maintain levels of carbon dioxide (CO<sub>2</sub>). Of particular importance is the ability of many animals to sense and respond to high levels of CO<sub>2</sub> by either attraction or aversion [1–5]. In mammals, high levels of CO<sub>2</sub> (hypercapnia) impair alveolar epithelial function of the lungs by activating the stress sensor AMPK, which leads to Na,K-ATPase endocytosis, impaired cell proliferation, and loss of distal lung epithelial function [6–10]. In addition, hypercapnia suppresses specific innate immune responses in *Drosophila* and mice, which increases mortality in a model of pneumonia and leads to changes in gene expression through the NF-κB pathway [11–14]. Cyclic AMP (cAMP) signaling also plays a role in the response of mammalian cells to elevated CO<sub>2</sub> levels [15–17]. The molecular pathways mediating the responses to hypercapnia are the focus of intensive research (see [11,18] and review in [19]).

High levels of CO<sub>2</sub> quickly elicit an avoidance response in wild-type *Caenorhabditis elegans* animals via a cGMP signaling pathway [2,4]. The cGMP-regulated avoidance response requires the CO<sub>2</sub>- and oxygen (O<sub>2</sub>)-sensing BAG neurons, in which the guanylyl cyclase receptor, *gcy-9*, controls the response to CO<sub>2</sub> [20–22]. Interestingly, the response to hypercapnia requires the ETS-domain transcription factor, ETS-5, which controls the

expression of *gcy-9* in the BAG neurons and plays a role in BAG neuron differentiation [20–22]. Recently, the thermosensory AFD neurons and the salt-sensing ASE neurons were also shown to participate in CO<sub>2</sub> sensing and avoidance [23]. These neurons, however, differ in their response kinetics to high levels of CO<sub>2</sub>; whereas BAG neurons reach maximal activation within 30 s, ASE neurons reach maximal activation only after 2 min, and AFD neurons show intricate dynamics in which Ca<sup>2+</sup> levels first drop and then increase to maximal levels after 2 min [23]. Interestingly, starved *C. elegans* do not avoid high CO<sub>2</sub> levels, nor do animals with defects in the *daf-2* signaling pathway, which is an important regulator of the starvation response [2,4].

In addition to avoidance, *C. elegans* exposed to high CO<sub>2</sub> levels show specific phenotypes independent of pH [24]. These include a smaller brood size, delayed development, reduced motility coupled with deterioration of striated muscle, and a significant increase in lifespan that is independent of known life-extending pathways [24].

Here we report that exposure of *C. elegans* animals to short (10 s) hypercapnia-inducing levels of CO<sub>2</sub> (≥5%) leads to a significant reduction in the rate of pharyngeal muscle contraction (pumping). Strikingly, this effect is independent of any currently known molecular pathways that regulate CO<sub>2</sub> avoidance or O<sub>2</sub> sensing. Specifically, through a forward genetic screen, we identified a novel participant in the response to CO<sub>2</sub>, *hid-1*, that

## Author Summary

Carbon dioxide (CO<sub>2</sub>) is a key molecule in many biological processes. High levels of CO<sub>2</sub> in patients with pulmonary diseases are associated with worse outcomes. However, mechanisms by which organisms sense and respond to high CO<sub>2</sub> levels remain largely unknown. Using *Caenorhabditis elegans* as a model system, we found that exposure to high CO<sub>2</sub> levels leads to a very rapid cessation in the contraction of the pharynx muscles. Further analysis revealed that the pharynx muscle response is controlled by dense core vesicle secretion from the BAG neurons in a *hid-1*-mediated pathway. This novel *hid-1* pathway sheds new light on the physiological effects of high CO<sub>2</sub> levels on animals at the organism-wide level.

plays a role in continued pumping in the presence of high CO<sub>2</sub> levels. Moreover, we show that dense core vesicle secretion pathways in the BAG neurons contribute to the reduced pumping rate in response to high CO<sub>2</sub> levels.

## Results

### High levels of CO<sub>2</sub> significantly reduce the pumping rate of the pharynx

To investigate the effects of acute exposure of wild-type *C. elegans* (N2) to high levels of CO<sub>2</sub>, we exposed 1-day-old adult animals grown on standard NGM plates in a small chamber to gas mixtures containing 21% O<sub>2</sub> and 5%, 10%, or 20% CO<sub>2</sub> at 22°C. In normal air (0.0391% CO<sub>2</sub>), the rate of muscle contraction of the pharynx was ~200 pumps/min. Within 10 s of exposure to 5% CO<sub>2</sub> balanced with 21% O<sub>2</sub> and 74% N<sub>2</sub>, the pumping rate of the pharynx was reduced from ~200 to ~60 pumps/min (Figure 1A). Exposure to 10% and 20% CO<sub>2</sub> almost completely stopped the pumping of the pharynx (Figure 1A and Movie S1). After 2–3 min of continuous exposure to 10% CO<sub>2</sub>, pumping rate recovered partially to ~40 pumps/min, and after 5 min of continuous exposure to 10% CO<sub>2</sub> it recovered to ~80 pumps/min (Figure 1B), suggesting a separate, existing mechanism that allows for a partial adaptation. Longer exposures of up to 30 min to 10% CO<sub>2</sub> did not result in full recovery of the pumping rate (Figure S1A). To test whether the effect on the pumping is mediated by a change in the pH of the growth medium due to high CO<sub>2</sub> levels, we measured the pumping rate of animals using NGM plates buffered to pH of 5.0 and 7.0 in addition to the normally used medium with a pH of 6.0. We did not find any differences between the animals in different growth mediums, both under normal air conditions and after exposure to 10% CO<sub>2</sub>, which suggests that the effect on the pumping is probably not mediated by changes in pH (Figure S1B). This conclusion is supported by a recent finding that activation of CO<sub>2</sub>-responsive neurons can occur independently of changes in extracellular or intracellular acidosis [25]. In addition, mutations in the carbonic anhydrase genes (*cah-2*, *cah-5*, and *cah-6*), which catalyze the conversion of CO<sub>2</sub> into bicarbonate, had no effect on the pumping rate (Figure S1C). This suggests that the conversion of CO<sub>2</sub> into bicarbonate is not necessary to induce the response of the pharynx. However, we cannot rule out the possibility of redundancy between the different carbonic anhydrase genes.

The response of the pharynx to high CO<sub>2</sub> levels was partially dependent on the nutritional state of the animal. Whereas “well fed” animals exposed to 10% CO<sub>2</sub> stopped pumping, animals starved for 4 h continued pumping at a rate of ~60 pumps/min (Figure 1C). These starved animals exposed to 20% CO<sub>2</sub> stopped pumping,

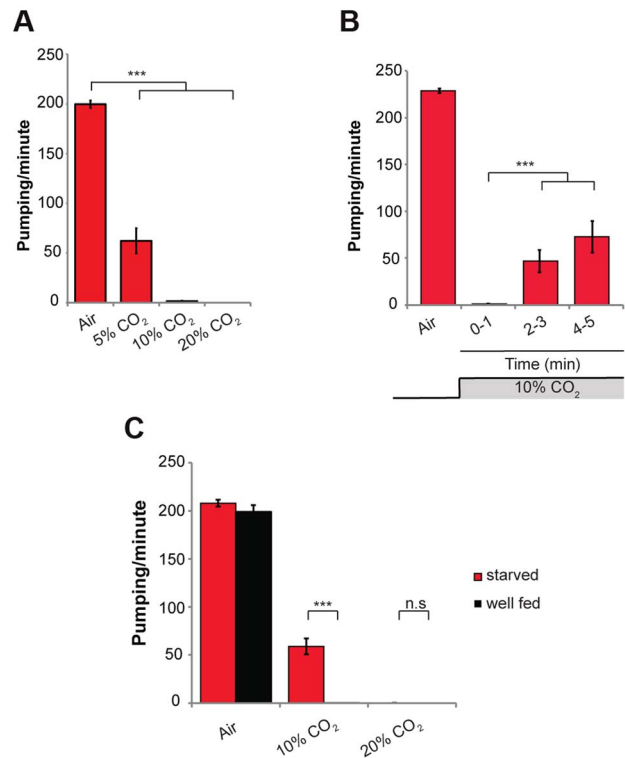

**Figure 1. High levels of CO<sub>2</sub> reduce the pumping rate of the pharynx.** (A) One-day-old wild-type (N2) adult *C. elegans* were exposed to 5%, 10%, or 20% CO<sub>2</sub> balanced with 21% O<sub>2</sub> and N<sub>2</sub>. The pumping rate was measured under a dissecting microscope while the animals were exposed to different gas mixtures. A gas mixture of 21% O<sub>2</sub> and 79% N<sub>2</sub> was used as a normal air control. (B) One-day-old wild-type (N2) adult *C. elegans* were continuously exposed to 10% CO<sub>2</sub> for 5 min. The pumping rate was measured during minutes 1, 3, and 5 of exposure to CO<sub>2</sub>. (C) One-day-old wild-type (N2) adult *C. elegans* were starved for 4 h and then the pumping rate was measured in 10% or 20% CO<sub>2</sub>. Well-fed worms were used as a control. In all experiments  $N \geq 30$  animals. Different groups were compared by one-way ANOVA followed by *t* test. \*\*\* $P < .001$ . Error bars indicate SEM. doi:10.1371/journal.pgen.1004529.g001

similar to wild-type animals (Figure 1C), suggesting a threshold effect of high CO<sub>2</sub> levels. Together, these data demonstrate that high CO<sub>2</sub> levels quickly affect muscle contraction of the pharynx, an effect that depends on the nutritional state of the animal.

### The reduction in pumping is independent of CO<sub>2</sub> avoidance and O<sub>2</sub> sensing

*C. elegans* animals quickly withdraw when acutely exposed to CO<sub>2</sub>. This response, known as CO<sub>2</sub> avoidance, is regulated by cGMP signaling [2,4]. TAX-2 and TAX-4 are two subunits of a cGMP-gated ion channel required for normal chemosensory and thermosensory responses. *C. elegans* null mutants for either TAX-2 (*tax-2[p691]*) or TAX-4 (*tax-4[p678]*) do not avoid high CO<sub>2</sub>. In addition, the insulin-IGF pathway mediates CO<sub>2</sub> avoidance, as *daf-2* mutants show reduced CO<sub>2</sub> avoidance [2,4]. The avoidance response also requires proper development of ciliated sensory neurons. Animals with mutations in *osm-3* and *che-10* have abnormal cilia as well as defective CO<sub>2</sub> avoidance. In *C. elegans* strains carrying mutations in *daf-2*, *osm-3*, or *che-10* the CO<sub>2</sub> avoidance response is either reduced or absent [2,4].

The effect of high CO<sub>2</sub> levels on the *C. elegans* pharynx is quick and robust, similar to the avoidance response. However, rather

than CO<sub>2</sub> avoidance, *tax-4(p678)*, *daf-2(e1370)*, *osm-3(n1540)*, and *che-10(e1809)* mutants show a significant reduction in pumping following exposure to 10% CO<sub>2</sub>, similar to the reduction observed in wild-type (N2) animals (Figure 2A). Loss-of-function mutation of the neuropeptide Y receptor, *npr-1*, completely abolishes the CO<sub>2</sub> avoidance response by inhibiting the activity of the O<sub>2</sub>-sensing URX neurons [3]. In our assay, exposing *npr-1(ad609)* animals to 10% CO<sub>2</sub> resulted in a response similar to that of wild-type animals (Figure 2A), suggesting that the high activity of the URX neurons in the animals with loss-of-function mutation in *npr-1* does not regulate the pharynx response to CO<sub>2</sub>. The *gcy-9* gene encodes a receptor-type guanylyl cyclase and is a target of the ETS domain ETS-5 transcription factor. Both the *ets-5* and *gcy-9* genes are required for the CO<sub>2</sub> avoidance response [20–22]. When exposed to 10% CO<sub>2</sub>, the *gcy-9(tm2816)*, *ets-5(tm1734)*, and *ets-5(tm1755)* mutants stopped pumping, similar to wild-type animals (Figure 2B), thus further demonstrating that CO<sub>2</sub> avoidance and acute CO<sub>2</sub>-dependent pumping inhibition are mediated through independent pathways.

To determine whether molecular pathways shared by O<sub>2</sub> sensing mediate the response of the pharynx to elevated CO<sub>2</sub> levels, we tested strains with mutations in the *gcy-31*, *gcy-33*, *gcy-35*, or *gcy-36* genes. These genes encode soluble guanylyl cyclases (sGC) that bind O<sub>2</sub> and sense decreases (*gcy-31* and *gcy-33*) or increases (*gcy-35* and *gcy-36*) in O<sub>2</sub> levels [26]. Exposing the *C. elegans* strains *gcy-31(ok296)*, *gcy-33(ok232)*, *gcy-35(ok769)*, or *gcy-36(db42)* to 10% CO<sub>2</sub> resulted in pumping inhibition similar to that observed in wild-type animals (Figure 2C). These results suggest that the effect of high CO<sub>2</sub> levels on the pumping rate does not involve O<sub>2</sub> sensing.

### HID-1 is required for the CO<sub>2</sub>-dependent pumping response

To identify genes that are involved in regulating the pharynx response to 10% CO<sub>2</sub>, we performed a forward genetic screen after ethyl methanesulfonate (EMS) mutagenesis. Specifically, we screened for mutant animals that do not stop pumping in response to 10% CO<sub>2</sub> (Movie S2). We screened the progeny of ~1200 F1 animals and found three strains that continued pumping when exposed to 10% CO<sub>2</sub>. One of these strains was further crossed to the Hawaiian strain, and deep sequencing was performed on DNA from recombinant F2 progeny. The region containing the mutant gene that enabled continuous pumping in 10% CO<sub>2</sub> was identified by searching for a low number of Hawaiian single-nucleotide polymorphisms (SNPs), as described elsewhere [27]. This mutant strain has a premature stop codon in a previously characterized highly conserved gene, *hid-1*. In 5% CO<sub>2</sub>, unlike in wild-type animals, the pumping rate of animals with the isolated *hid-1(yg316)* allele was similar to the pumping rate in normal air conditions, and significant pumping continued after exposure to 10% CO<sub>2</sub>, whereas in 20% CO<sub>2</sub> pumping was abolished (Figure 3A).

The effect of HID-1 on the response to high levels of CO<sub>2</sub> was specific to the pharynx, since *hid-1* mutant animals still showed reduced egg laying (Figure S2) and a slower rate of development (data not shown), similar to wild-type animals exposed to high CO<sub>2</sub> levels [24]. Two other alleles of *hid-1*, *sa722* and *sa1058* [28], also showed continuous pumping when exposed to 10% CO<sub>2</sub> (Figure 3B). The change in pumping rate in response to CO<sub>2</sub> is specific to HID-1, since transgenic expression of HID-1::GFP under its own promoter, in either *hid-1(sa722)* or *hid-1(yg316)* strains (Figure S3), was sufficient to restore the normal reduced pumping rate in 10% CO<sub>2</sub> (Figure 3B). Together, these data

suggest that *hid-1* is required for the response of the pharynx to high levels of CO<sub>2</sub>.

### Other dense core vesicle secretion and maturation mutants are also involved in the inhibition of pumping by CO<sub>2</sub>

Dense core vesicles (DCVs) secrete neuropeptides in peptidergic neurons [29]. HID-1 is associated with Golgi membranes by way of N-terminal myristoylation and is required for the sorting of DCVs, where it prevents sorting of peptide cargoes to lysosomes for degradation [30–32]. We hypothesized that HID-1 plays a role in the response of the pharynx to high CO<sub>2</sub> by regulating neuropeptide secretion. We tested this hypothesis by scoring pumping response to 10% CO<sub>2</sub> in mutants defective in other genes involved in neuropeptide secretion. The gene *unc-31* encodes the *C. elegans* ortholog of CAPS (calcium-dependent activator protein for secretion), an important component of DCV exocytosis [33]. The gene *egl-21* encodes the *C. elegans* ortholog of carboxypeptidase E, an important component in neuropeptide maturation [34]. Following exposure of *unc-31(e928)* or *egl-21(n476)* deletion strains to 10% CO<sub>2</sub>, the pumping rate of the pharynx was significantly higher compared with that in wild-type animals exposed to the same concentration of CO<sub>2</sub> (Figure 4A). We also tested the role of synaptic vesicle secretion on the pumping response to 10% CO<sub>2</sub>. The *unc-13* gene is involved in synaptic vesicle secretion of neurotransmitters [35,36]. The *rab-3* gene is a Rab GTPase that affects the distribution of synaptic vesicle populations [37]. Exposure of *unc-13(e1091)* or *rab-3(js49)* mutant strains to 10% CO<sub>2</sub> showed pumping behavior similar to that of wild-type strains (Figure 4A). These data suggest that DCVs play an important role in mediating the response of the pharynx to high CO<sub>2</sub> levels and that compromising DCV secretion probably impairs the pumping response to high CO<sub>2</sub> levels.

### Expression of HID-1 in the BAG neurons is sufficient to restore wild-type CO<sub>2</sub> response in *hid-1* mutant strains

HID-1 is expressed in all neuron and gut cells of *C. elegans* [30]. To test whether inhibition of pharynx pumping in response to 10% CO<sub>2</sub> requires expression of *hid-1* in the gut, neurons, or both, we used transgenic lines that express HID-1 fused to GFP driven by either the pan-neuronal promoter *rab-3* or the gut-specific promoter *ges-1*. Expression of HID-1 under the *rab-3* promoter in neurons of *hid-1(sa722)* background was sufficient to restore inhibition of the pharynx pumping almost to the levels shown by wild-type animals (Figure 4B). In contrast, expression of HID-1 under the *ges-1* promoter in the gut of *hid-1(sa722)* had no significant effect on the response of the pharynx to 10% CO<sub>2</sub>.

We next asked which subset of neurons is required for mediating the effect of high CO<sub>2</sub> levels on the pharynx. The *nlp-3* gene is expressed in sensory neurons (ADF, ASE, ASH, AWB, ASJ, and BAG) as well as in pharyngeal neurons (I1, I2, I3, I4, M1, M3, and NSMR) (Figure S3) [38]. Transgenic expression of HID-1::GFP under the *nlp-3* promoter in *hid-1(sa722)* background was sufficient to restore pharynx pumping inhibition after exposure to 10% CO<sub>2</sub> (Figure 4B). High levels of CO<sub>2</sub> activate the AFD neurons [23]. Surprisingly, transgenic expression of HID-1::GFP driven by a *gcy-8* promoter in the thermosensory AFD of *hid-1(sa722)* background did not restore the CO<sub>2</sub>-mediated pumping inhibition (Figure 4B), which suggests that the activation of the AFD neurons by high CO<sub>2</sub> levels is not sufficient to induce the peptidergic signaling that mediates the effect of high CO<sub>2</sub> levels on the pharynx. Among the sensory neurons expressing

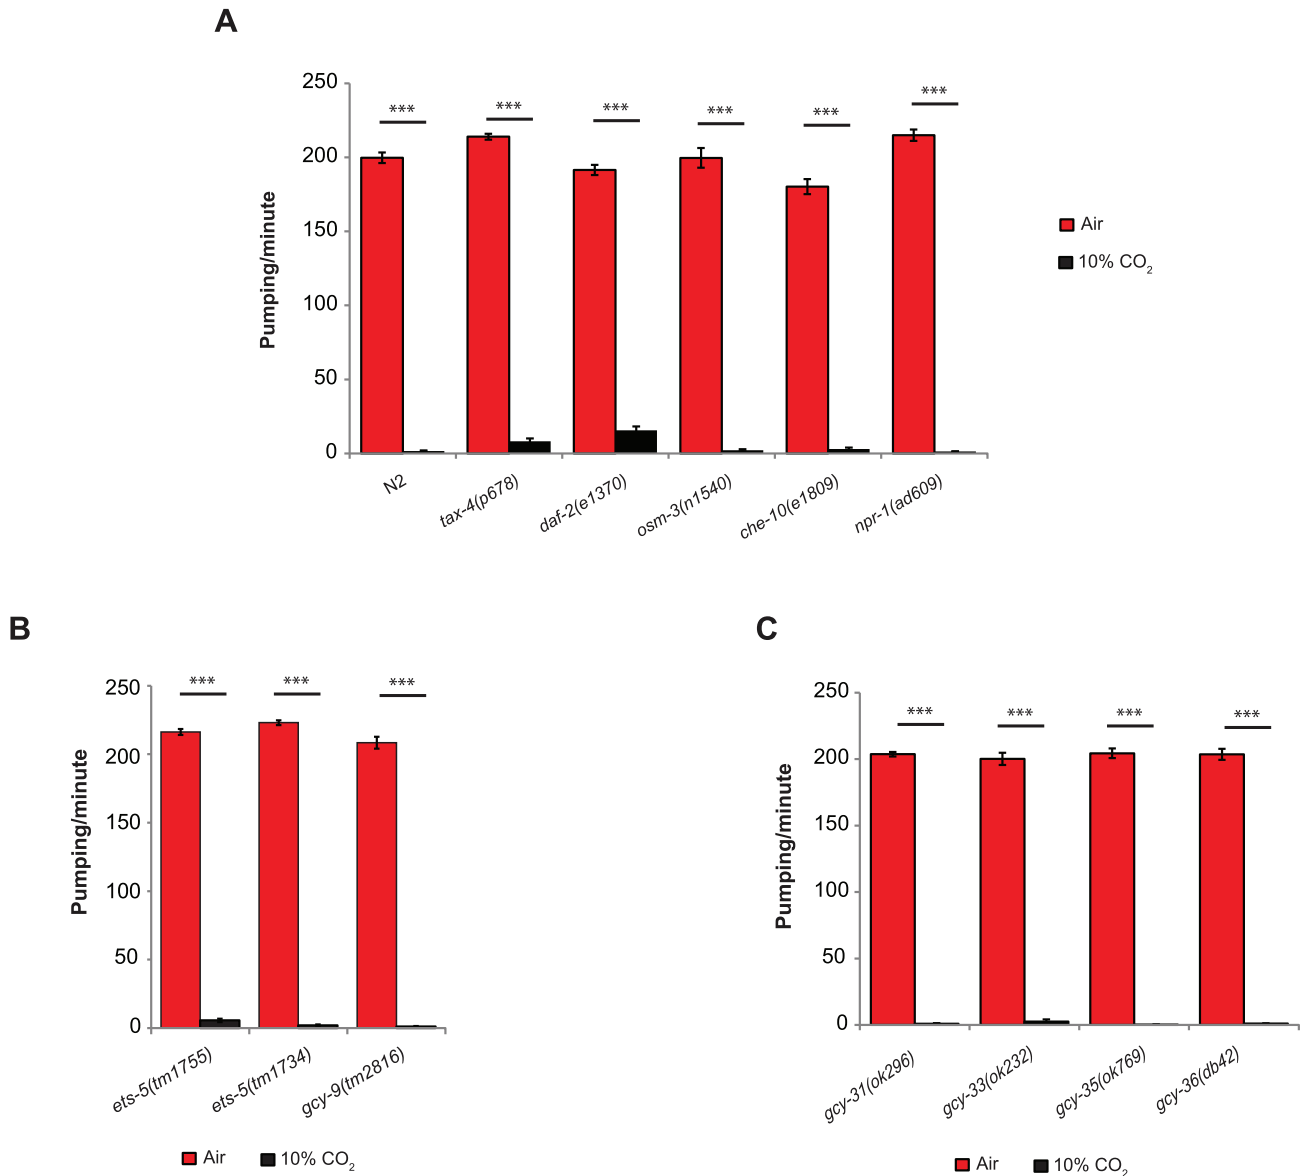

**Figure 2. The inhibition of pumping following exposure to high CO<sub>2</sub> level is independent of molecular pathways that regulate CO<sub>2</sub> avoidance and oxygen sensing.** One-day-old adult *C. elegans* strains containing mutations in genes that regulate CO<sub>2</sub> avoidance (**A, B**) or O<sub>2</sub> sensing (**C**) were exposed to 10% CO<sub>2</sub>. The pumping rate was measured under a dissecting microscope during the first minute of exposure to CO<sub>2</sub>. In all experiments  $N \geq 30$  animals. Different groups were compared by one-way ANOVA followed by *t* test. \*\*\* $P < .001$ . Error bars indicate SEM. doi:10.1371/journal.pgen.1004529.g002

*nlp-3* are the BAG and the ASE neurons, which are also known to respond to high CO<sub>2</sub> levels [23]. Transgenic expression of HID-1::GFP driven by the *osm-6* promoter, which was expressed in ASE neurons (undetected in BAG neurons), did not restore the CO<sub>2</sub>-mediated pumping inhibition (Figure 4B). We next tested the role of BAG neurons in the CO<sub>2</sub>-dependent pumping inhibition of the pharynx. Transgenic lines expressing HID-1::GFP under the promoter of *flp-17* showed expression in the BAG neurons (Figure S3). This expression was sufficient to fully restore the CO<sub>2</sub>-dependent pumping inhibition (Figure 4B). Similarly, the expression of HID-1::GFP under the *gcy-33* promoter in *hid-1(sa722)* background was specific to the BAG neurons (Figure S3) [21]. This expression was sufficient to fully restore the CO<sub>2</sub>-dependent pumping inhibition (Figure 4B). Next, we ablated the BAG

neurons in transgenic worms expressing HID-1::GFP under *flp-17* and *gcy-33* promoters in *hid-1(sa722)* background. We found that following the removal of the HID-1::GFP-expressing BAG neurons, the pumping in 10% CO<sub>2</sub> was similar to that of *hid-1(sa722)* animals (Figure 4C). These results suggest that the specific expression of HID-1 in the BAG neurons is sufficient to induce the CO<sub>2</sub>-dependent pumping inhibition. We also ablated the BAG neurons in wild-type background using GFP driven by *gcy-33* promoter as a marker. We found that following ablation of the BAG neurons, the pumping in response to 10% CO<sub>2</sub> was similar to that in HID-1-null animals (Figure 4C). These results suggest that the BAG neurons are required for the pumping inhibition. In addition, to test possible cross talk between the neuropeptide secretion pathway and the guanylyl cyclase receptor

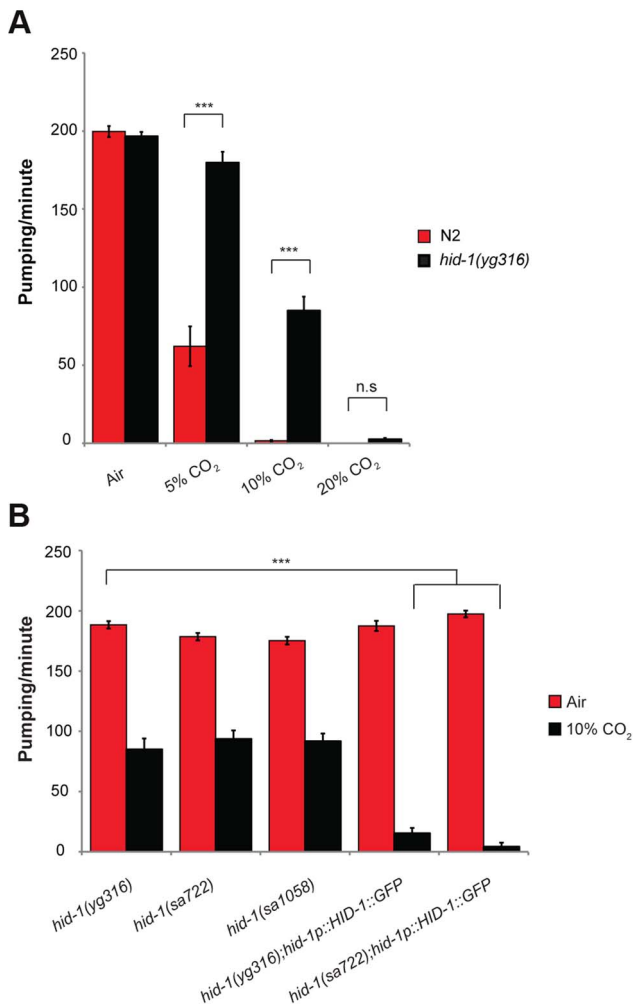

**Figure 3. HID-1 is required for sensing CO<sub>2</sub> level in the pharynx.** (A) One-day-old adult *hid-1(yg316)* and N2 worms were exposed to 5%, 10%, or 20% CO<sub>2</sub> balanced with 21% O<sub>2</sub> and N<sub>2</sub>. The pumping rate was measured under a dissecting microscope while the animals were exposed to the different gas mixtures. A gas mixture of 21% O<sub>2</sub> and 79% N<sub>2</sub> was used as a normal air control. (B) The inhibition of the pumping rate of the pharynx after exposure to high CO<sub>2</sub> level in *hid-1(yg316)* allele mutants is significantly reduced. Similarly, the inhibition of the pumping rate of the pharynx after exposure to high CO<sub>2</sub> level is reduced in other *hid-1* allele mutants (*sa722* and *sa1058*). Transgenic expression of HID-1 fused to eGFP in the *sa722* or *yg316* background (*hid-1(sa722);HID-1::GFP* or *hid-1(yg316);HID-1::GFP*) is sufficient to restore the effect of high CO<sub>2</sub> level on the pumping rate back to the wild-type phenotype. In all experiments  $N \geq 30$  animals. Different groups were compared by one-way ANOVA followed by *t* test. \*\*\* $P < .001$ . Error bars indicate SEM. doi:10.1371/journal.pgen.1004529.g003

pathway, which is required for CO<sub>2</sub> avoidance, we measured the pharyngeal pumping rate of animals carrying both *hid-1(sa722)* and *gcy-9(tm2816)* mutations. The pumping rate was similar to that of *hid-1(sa722)* animals (Figure 4D). Moreover, in the same genetic background, transgenic expression of HID-1 in the BAG neurons, using the *flp-17* promoter, restored the suppression of pumping in the presence of high CO<sub>2</sub> level (Figure 4D), further demonstrating that the response to CO<sub>2</sub> mediated by *hid-1* is independent of the response to CO<sub>2</sub> mediated by *gcy-9*. We conclude that proper *hid-1* activity in the BAG neurons is important to mediate the pumping inhibition by CO<sub>2</sub>.

## Discussion

In humans, high CO<sub>2</sub> levels have diverse effects on the lung epithelium, immunity, and muscle function. However, the effects of acute exposure of muscle cells to high CO<sub>2</sub> levels were unknown. In addition, recent studies suggest that mammals, like *C. elegans*, are able to sense elevated CO<sub>2</sub> levels, which is of broad physiologic significance.

### CO<sub>2</sub> avoidance and CO<sub>2</sub>-dependent reduced pharyngeal pumping are probably regulated via different pathways

Acute exposure of well-fed adult *C. elegans* animals to high CO<sub>2</sub> levels quickly reduces the pumping rate of the pharynx. This effect depends in part on the nutritional status of the animal, since starved animals exposed to 10% CO<sub>2</sub> in air continue to pump, albeit at a significantly slower rate. Our genetic data suggest that the effect of acute exposure to high CO<sub>2</sub> levels on the pumping rate is independent of the avoidance responses of *C. elegans* to high CO<sub>2</sub> levels. First, cGMP signaling is required for mediating the avoidance response, as mutations in the cGMP gated ion channel encoded by *tax-2* and *tax-4* completely disrupt the avoidance response [2,4]. In contrast, the same mutation in *tax-4* does not completely rescue the immediate response of the pumping rate to high CO<sub>2</sub> levels. Second, mutation in the insulin-like receptor encoded by *daf-2* also disrupts the avoidance response [2,4]. The pumping rate of *daf-2* mutants under exposure to 10% CO<sub>2</sub> is dramatically reduced, like in the wild-type animals. The limited recovery of the pumping rate in *daf-2* mutants at 10% CO<sub>2</sub> could be due to the effect of *daf-2* on starvation regulating pathways [39,40]. Third, interference with proper function of ciliated sensory neurons by mutations in *osm-3* and *che-10* also significantly changes the avoidance response. Again, in the pumping assay, similar mutations in these genes did not change the response of *C. elegans* to high CO<sub>2</sub> levels. In addition, mutations in *ets-5* and *gcy-9*, which were previously shown to be required for the calcium response of the BAG neurons to CO<sub>2</sub>, did not change the response of the pharynx to high CO<sub>2</sub> levels. Finally, the rescue of pumping by *hid-1* in the BAG neurons was not affected by *gcy-9* mutations.

*C. elegans* animals presumably interpret high CO<sub>2</sub> levels as a harmful cue that leads to avoidance and pumping inhibition. The ability of the animal to stop eating for several minutes probably allows it to avoid undesirable food. Surprisingly, although both the avoidance and the pumping responses to the same stressful cue are immediate, our genetic data suggest that different molecular pathways mediate the two responses to high CO<sub>2</sub>.

### The potential role of neuropeptides in the response of the pharynx to high levels of CO<sub>2</sub>

Our genetic screen identified *hid-1* as a regulator of the pumping response to high CO<sub>2</sub> levels, as mutations in the *hid-1* gene blunted the response of the pharynx to high CO<sub>2</sub> levels. HID-1 is required for the neuropeptide secretion pathway [30,32]. Indeed, mutations in other known genes in peptidergic signaling, *unc-31* and *egl-21*, could also partially suppress the pharyngeal pumping suppression upon exposure to 10% CO<sub>2</sub>. Neuropeptides are important signaling molecules in many physiological responses both in *C. elegans* and in other organisms. In *C. elegans* there are more than 250 neuropeptides that play a role in feeding and metabolism, and most neurons in *C. elegans* secrete neuropeptides [41]. Neuropeptides are also secreted from the intestine [38], and *hid-1*, an important peptidergic signaling gene, is expressed both in the nervous system and in the intestine [30,32]. Neuropeptide signaling was previously shown to regulate pumping inhibition in

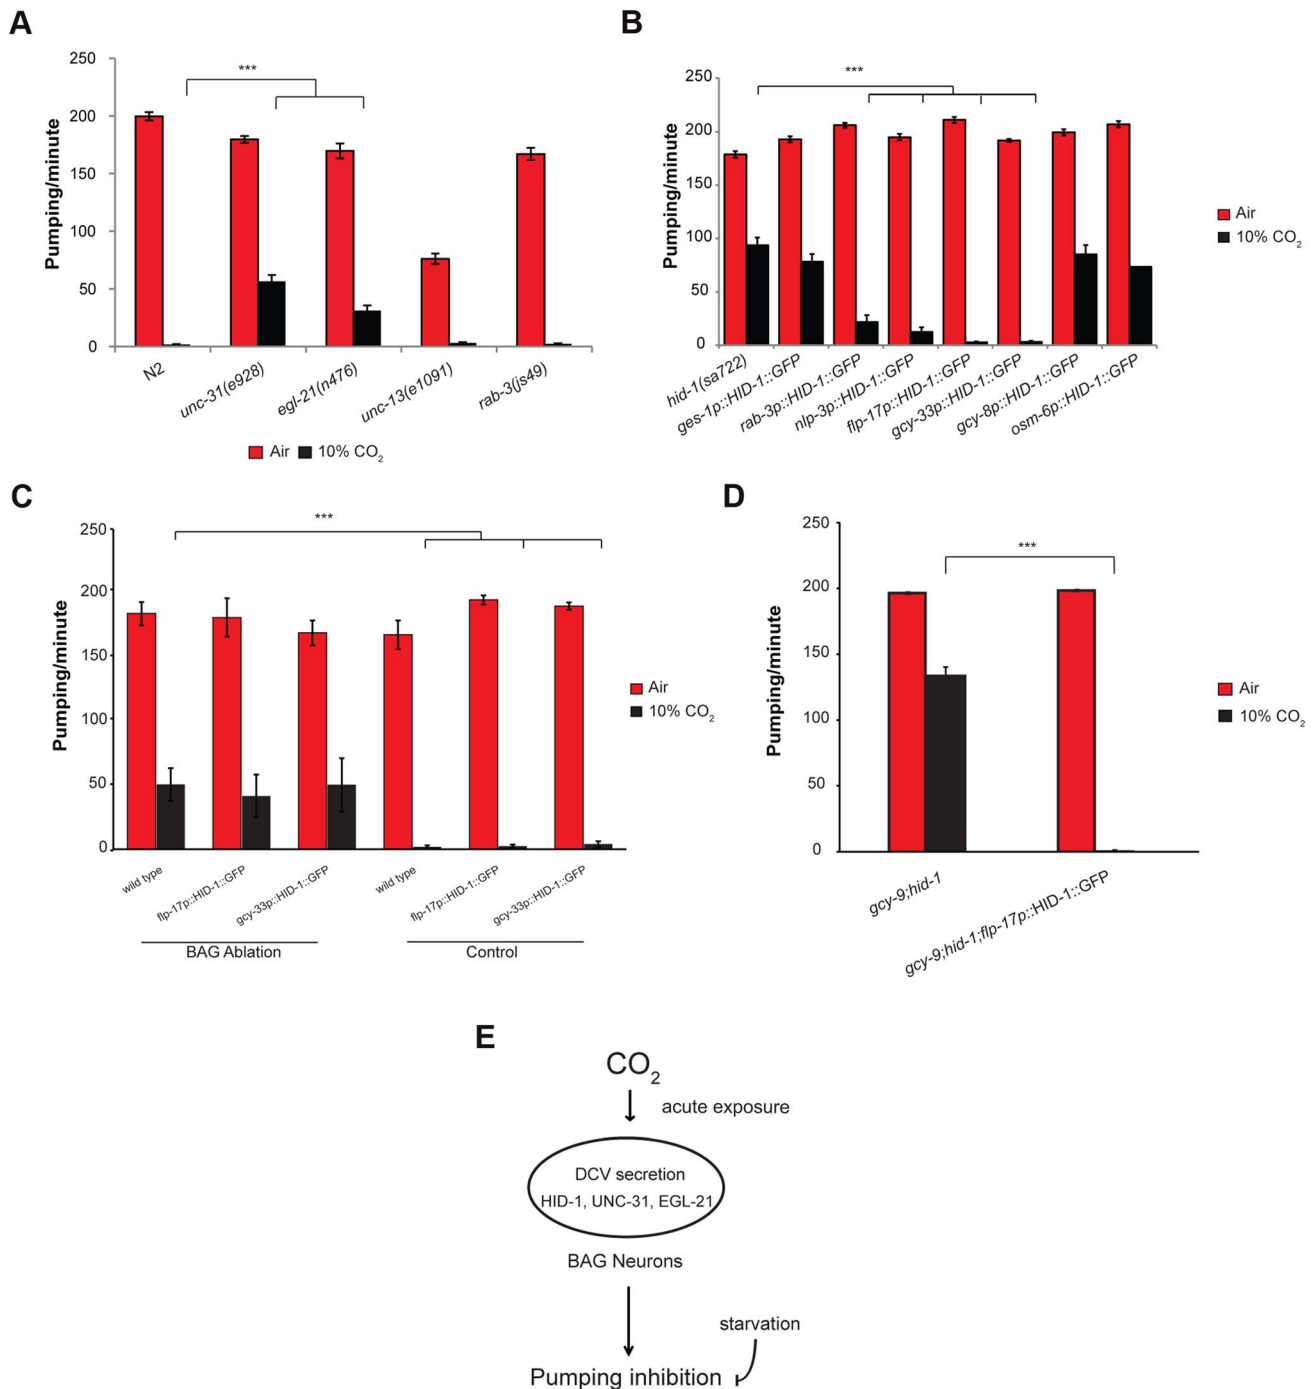

**Figure 4. The effect of high CO<sub>2</sub> level on the pharynx requires HID-1 activity in the BAG neurons.** (A) One-day-old adult *C. elegans* strains containing mutations in *unc-31* or *egl-21* genes, which are important for proper neuropeptide secretion and maturation, show a significant rescue of the pumping rate after exposure to 10% CO<sub>2</sub>. In contrast, strains with mutations in *unc-13* or *rab-3*, which promote synaptic vesicle secretion, do not show a changed pharynx response to 10% CO<sub>2</sub>. (B) Transgenic expression of HID-1 in the gut using the gut-specific *ges-1* promoter (*ges-1p*-HID-1::GFP) was not sufficient to restore pumping phenotype to wild type after exposure to 10% CO<sub>2</sub>. In contrast, transgenic expression of HID-1 in neurons using the *rab-3* promoter (*rab-3p*-HID-1::GFP) was sufficient to restore pumping rate after exposure to 10% CO<sub>2</sub> almost back to wild-type levels. Cell-specific expression of HID-1 in the AFD neurons (*gcy-8p*-HID-1::GFP) or in the amphid and tail ciliated neurons, including ASE neurons (*osm-6p*-HID-1::GFP), did not restore the CO<sub>2</sub> effect on the pumping back to wild-type levels, whereas cell-specific expression of HID-1 in sensory and pharyngeal neurons (*nlp-3p*-HID-1::GFP) or in BAG neurons (*flp-17p*-HID-1::GFP and *gcy-33p*-HID-1::GFP) was sufficient to restore the effect of high CO<sub>2</sub> level back to the wild-type phenotype. (C) The BAG neurons of wild-type *C. elegans* expressing *gcy-33p*:GFP were laser ablated and the pharyngeal pumping rate was measured in normal air and 10% CO<sub>2</sub>. Similarly, the BAG neurons of *flp-17p*:HID-1::GFP and *gcy-33p*:HID-1::GFP strains were laser ablated and the pharyngeal pumping rate subsequently measured. Controls include measurement of the pumping rate in the same *C. elegans* strains without ablation. (D) Transgenic expression of HID-1 in the BAG neurons of *hid-1(sa722);gcy-9(tm2816)* animals restores the suppression of pumping in the presence of high CO<sub>2</sub> level. (E) Schematic model of CO<sub>2</sub> response of pharyngeal muscle contraction. The inhibition of muscle contraction in the

pharynx is mediated by neuropeptide secretion via dense core vesicles (DCVs) in BAG neurons. The CO<sub>2</sub> response is decreased after starvation. In all experiments  $N \geq 30$  animals, except in panel C in *flp-17p::HID-1::GFP* ( $N = 5$ ) and *gcy-33p::HID-1::GFP* ( $N = 10$ ). Different groups were compared by one-way ANOVA followed by *t* test. \*\*\* $P < .001$ . Error bars indicate SEM. doi:10.1371/journal.pgen.1004529.g004

the absence of food [42]. Specifically, *unc-31* mutants demonstrate continuous pumping in the absence of food, unlike wild-type animals [42]. Since *hid-1* also partially suppresses the inhibition of pumping in the absence of food (data not shown), we cannot completely rule out the possibility that *hid-1* generally inhibits pumping and acts in parallel with CO<sub>2</sub>.

The pharynx response to 10% CO<sub>2</sub> is probably mediated by several different neuropeptides, since pumping inhibition could not be inhibited by deletion of individual neuropeptide genes known to be overexpressed in the BAG neurons, including *flp-10*, *flp-16*, *flp-27*, *nlp-1*, *flp-17*, and *nlp-14* (Figure S4). Neuropeptide secretion can only partially explain the response of the pharynx to high levels of CO<sub>2</sub>, since none of the peptidergic signaling mutants we examined at 10% CO<sub>2</sub> (*hid-1*, *unc-31*, and *egl-21*) exhibited the pumping rate seen at normal air levels (Figure 4). Thus we cannot completely rule out the possibility that the effects of *unc-31* and *egl-21* are due to the other pathway(s) that must be acting in parallel with *hid-1*. This implies the existence of other, HID-1-independent mechanisms that must regulate the response of the pharynx to CO<sub>2</sub> levels. For example, it is possible that high CO<sub>2</sub> levels trigger other presynaptic inputs that mediate the effect on the pharynx in parallel with the peptidergic signaling, or that CO<sub>2</sub> has also a direct postsynaptic effect on the pharyngeal muscles that inhibits their normal function. Interestingly, such parallel pathways depend on the CO<sub>2</sub> levels, since *hid-1* completely rescues the pumping inhibition at 5% CO<sub>2</sub> and fails to rescue the pumping at 20% CO<sub>2</sub> (Figure 3A).

### The presence of HID-1 is specifically required in the BAG neurons

Using transgenic lines that express HID-1 either in the gut or in the nervous system we have determined that the *hid-1* activity is specifically required in neurons to mediate the effect of high CO<sub>2</sub> levels on the pharynx. We used an AFD-specific promoter to show that *hid-1* activity in the AFD neurons, which are activated by high CO<sub>2</sub> levels [23], is not sufficient to mediate the effect of high CO<sub>2</sub> levels on the pharynx. In contrast, transgenic expression of HID-1::GFP under the *nlp-3* promoter is sufficient to restore CO<sub>2</sub>-mediated pharynx pumping inhibition. Using the BAG-specific promoters *flp-17* and *gcy-33* and performing ablation experiments on the BAG neurons, we have further narrowed the CO<sub>2</sub> effect on the pharynx to the BAG neurons. Paradoxically, our genetic data (Figures 2 and 4) suggest the existence of different molecular pathways for the avoidance and the pharynx responses. However, the BAG neurons in the pharynx response are the same neurons that control the avoidance response. Interestingly, mutant animals that block CO<sub>2</sub>-mediated calcium response in the BAG neurons still show normal pumping inhibition. The existence of such a pathway is especially surprising given that DCV secretion is expected to depend on an increase in calcium levels.

The physiological and molecular effects of high CO<sub>2</sub> levels, in both vertebrates and invertebrates, have been the focus of several recent studies [2,4,6,7,12,14,22,24,43]. However, the sensing mechanism of cells to high CO<sub>2</sub> levels is yet largely unknown. Soluble adenylyl cyclases are bicarbonate sensors in several organisms including mammals [15,44,45]. In *C. elegans*, which do not have soluble adenylyl cyclases, the soluble guanylyl cyclases GCY-31 and GCY-33 are important for eliciting CO<sub>2</sub> avoidance

in the BAG neurons [23]. However, it is yet unknown whether the *gcy* genes are directly activated by either CO<sub>2</sub> or HCO<sub>3</sub><sup>-</sup>. Our results show that neither GCY-31 nor GCY-33 are required for mediating the effect of high CO<sub>2</sub> levels on the pharynx (Figure 2C).

Our study sheds new light on the response of *C. elegans* to high CO<sub>2</sub> levels. It also shows that the CO<sub>2</sub>-induced response is differentially regulated across different tissues. Furthermore, different levels of CO<sub>2</sub> lead to various outcomes in the same tissue. Deciphering the mechanisms underlying these fundamental pathways will hopefully help us to better understand the CO<sub>2</sub>-induced responses that are activated in human diseases.

## Materials and Methods

### Strains

Worms were handled as described elsewhere [46]. The following strains were used in this study: N2 (wild type); CF1041, *daf-2(e1370)*; CB3329, *che-10(e1809)*; CX2948, *tax-4(p678)*; PR802, *osm-3(n1540)*; DA609, *npr-1(ad609)*; CZ3714, *gcy-31(ok296)*; CZ3715, *gcy-33(ok232)*; CX6448, *gcy-35(ok769)*; AX1296, *gcy-36(db42)*; JT722, *hid-1(sa722)*; JT1058, *hid-1(sa1058)*; YG316, *hid-1(yg316)*; YG2310, *hid-1(yg316)*; jsEx896 [*hid-1p::HID-1::GFP*]; NM3017, *hid-1(sa722)* and *lin-15(n765)*; jsEx896 [*hid-1p::HID-1::GFP*]; NM3053, *hid-1(sa722)* and *lin-15(n765)*; jsEx897 [*rab-3p::HID-1::GFP*]; NM3139, *hid-1(sa722)* and *lin-15(n765)*; jsEx909 [*ges-1p::HID-1::GFP*]; YG2313, *hid-1(sa722)*; ygEx317 [*gcy-8p::HID-1::GFP*]; YG2318, *hid-1(sa722)*; ygEx318 [*nlp-3p::HID-1::GFP*]; YG2319, *hid-1(sa722)*; ygEx319 [*flp-17p::HID-1::GFP*]; YG2340, *hid-1(sa722)*; ygEx320 [*gcy-33p::HID-1::GFP*]; DA509, *unc-31(e928)*; KP2018, *egl-21(n476)*; YG2302, *unc-13(e1091)*; YG2320, *ets-5(tm1734)*; YG2321, *ets-5(tm1755)*; YG2322, *gcy-9(tm2816)*; YG2323, *gcy-9(tm2816)* and *hid-1(sa722)*; YG2324, *gcy-9(tm2816)* and *hid-1(sa722)*; ygEx321 [*flp-17p::HID-1::GFP*]; RB1340, *nlp-1(ok1469)*; RB2575, *flp-19(ok3587)*; VC2012, *flp-27(gk3331)*; VC1108, *nlp-14(ok1517)/szT1 X*; RB1989, *flp-10(ok2624)*; RB2275, *flp-16(ok3085)*. All strains were obtained from the *C. elegans* Genome Center (CGC) or the National BioResource Project (NBRP), except for CX2948, which was kindly provided by the De-Bono laboratory, and NM3017, NM3053, and NM3139, which were kindly provided by the Nonet laboratory [2,30].

### Measurement of pumping rate

A standard NGM plate covered with a lid-shaped chamber with inlet and outlet holes to allow gas flow was used to measure the pumping rate under different concentrations of CO<sub>2</sub> in air. The chamber was connected to a mechanical valve that controlled the humidified gas mixture entering the chamber. For all pumping assays, NGM plates were seeded with 20  $\mu$ L of OP50 5 h before the experiment to allow normal feeding and to keep worms in a restricted area. A single 1-day-old adult worm was seeded on a plate just before the start of the experiment. Initially, normal air mixture (21% O<sub>2</sub>, 79% N<sub>2</sub>) flowed into the chamber and worms were allowed to adjust for 1 min. The number of pharynx muscle contractions was subsequently measured for 1 min under normal air conditions. Then the airflow was switched to a high-CO<sub>2</sub> gas mixture, and after 10 s the pharynx muscle contraction rate was measured again. To measure pumping rate after starvation,

well-fed wild-type 1-day-old adult worms were collected using M9 buffer and washed four or five times in M9 buffer. Worms were then seeded on either NGM plates with no bacteria or NGM plates seeded with OP50, for 4 h prior to measurements. All pumping assays were performed at 22°C.

### EMS screen and SNP mapping

The EMS mutagenesis was performed essentially as described elsewhere [46]. Briefly, wild-type (N2) worms in the L4 stage were exposed to 50 mM EMS in M9 buffer for 4 h and then transferred to fresh plates for 2–3 h (P<sub>0</sub>) for recovery. After recovery, five P<sub>0</sub> animals were transferred again to an NGM plate and allowed to lay F1 progeny. Adult F1 animals were cloned onto individual NGM plates and their L4-adult F2 progeny where exposed to 10% CO<sub>2</sub>. F2 worms that continued the pumping of the pharynx even after exposure to 10% CO<sub>2</sub> were isolated. In total, we scored the progeny of ~1200 F1 animals. The isolated strains were outcrossed three times. The mutation was mapped as described elsewhere [27]. Mutant worms were crossed with the Hawaiian strain and F1 progeny were isolated. Then 44 F2 recombinants that continued the pumping after exposure to 10% CO<sub>2</sub> were isolated, and the DNA of their F3 and F4 offspring was extracted using a Gentra Puregene kit (Qiagen, cat. no. 158667). Whole genome sequencing was performed using the Applied Biosystems SOLiD 3 deep sequencing apparatus. The positions of the Hawaiian SNPs were mapped on the DNA of the *yg316* strain. A 1.2-MB region in chromosome X that did not contain any Hawaiian SNP was found. Within this region a premature stop codon (W625X) in the coding sequence of *hid-1* was found to cause the phenotype as described in the text.

### Plasmid constructs, transgenes, and laser ablation

The NM1699 construct, which contains the *hid-1* promoter driving the genomic *hid-1* coding region fused to eGFP, was a kind gift from the Nonet laboratory [30]. The NM1699 construct was digested with KpnI and AatII to replace the native *hid-1* promoter with various neuron-specific promoters. To drive AFD-specific expression an 800-bp fragment upstream of the *gcy-8* start codon was amplified and subsequently digested with KpnI-AatII to generate pKS10. Similarly, to drive sensory and pharyngeal specific expression, a 700-bp fragment upstream of the *nlp-3* start codon was amplified and digested with KpnI-AatII to generate pKS20. To drive BAG-specific expression a 3.4-kb fragment upstream of the *flp-17* start codon was amplified and fused by PCR to HID-1::GFP from NM1699. In addition, to drive BAG-specific expression a 980-bp fragment upstream of the *gcy-33* start codon was amplified and subsequently digested with KpnI-AatII to generate pKS30. All plasmids were verified by sequencing and microinjected to either JT722 or YG316 with an *elt-2*::GFP marker as described elsewhere [47].

Laser ablation was performed using an Andor Revolution XD confocal spinning disk system with a Nikon TiE inverted microscope equipped with a nitrogen pulsed laser and a 365-nm Micropoint dye cell. The microscope and laser were controlled by means of IQ software and the Micropoint Mosaic I System 85-75, respectively. The region of interest was set according to the size of the neuron cell body as revealed by the GFP marker. We used a frequency of 15 Hz, an energy range of 80%–90%, and 3–5 repeats in order to completely ablate the GFP marker in the neuron cell body.

### Supporting Information

**Figure S1** Pumping inhibition is not rescued by either 30 min of exposure to 10% CO<sub>2</sub>, pH of 5.0 or 7.0, or mutations in the carbonic anhydrase genes. **(A)** One-day-old wild-type (N2) adult *C. elegans* were continuously exposed to 10% CO<sub>2</sub> for 30 min and pumping rate was measured at different time points. **(B)** One-day-old wild-type (N2) adult *C. elegans* were transferred to NGM plates buffered at pH of 5.0, 6.0, or 7.0 followed by exposure to 10% CO<sub>2</sub> and measurements of the pharyngeal pumping. **(C)** One-day-old adult worms with mutations in *cah-2*, *cah-5*, or *cah-6* genes exposed to 10% CO<sub>2</sub> showed pharyngeal pumping rate similar to that of wild-type animals. (PDF)

**Figure S2** The egg-laying rate of *hid-1(yg316)* animals exposed to 10% CO<sub>2</sub> is similar to that of wild-type animals. Gravid animals were exposed to either normal air conditions or air containing 19% or 10% CO<sub>2</sub> for 6 h. The number of embryos laid during this period was measured. (PDF)

**Figure S3** Transgenic expression of HID-1::GFP. HID-1 fused to eGFP was expressed under its own promoter in the background of *yg316* or under *gcy-8*, *nlp-3*, *osm-6*, *flp-17*, or *gcy-33* promoters in the background of *sa722*. Arrows indicate the AFD neurons (*gcy-8p*) and BAG neurons (*flp-17p* and *gcy-33p*). The expression of *hid-1p*, *nlp-3p* and *osm-6p* was detected in several neurons. Scale bar, 10 μm. (PDF)

**Figure S4** Animals with deletions in neuropeptide genes expressed in the BAG neurons still show strong CO<sub>2</sub>-mediated pumping inhibition. One-day-old animals with mutations in neuropeptide genes, which are known to be overexpressed in the BAG neurons, were exposed to 10% CO<sub>2</sub> and pumping rate was measured. The pumping rate of *nlp-1*, *nlp-14*, and *flp-16* mutants in 10% CO<sub>2</sub> (but not in normal air conditions) was significantly different from that of the wild-type (N2) animals and showed small but significant rescue. \**P*<.01. Error bars indicate SEM. (PDF)

**Movie S1** Pumping of wild-type *C. elegans* exposed to 10% CO<sub>2</sub>. Pumping rate of wild-type animal under dissecting microscope is presented. Worms are first exposed to normal air and then exposed to 10% CO<sub>2</sub>. (AVI)

**Movie S2** Pumping of *hid-1(yg316)* mutant exposed to 10% CO<sub>2</sub>. Pumping rate of *hid-1(yg316)* mutant animal under dissecting microscope is presented. Worms are first exposed to normal air and then exposed to 10% CO<sub>2</sub>. (AVI)

### Acknowledgments

We thank Tamar Gattegno, Veronika Kravtsov, and Benjamin Podbilewicz for their help with the ablation experiments, Valery Zayat for helping to create the *gcy-33-HID-1::GFP* strains, Jennifer Davis for editing the manuscript, and the Nonet and DeBono laboratories for providing strains and constructs.

### Author Contributions

Conceived and designed the experiments: KS AZ JIS YG. Performed the experiments: KS CC NF IM. Analyzed the data: KS AZ JIS YG. Wrote the paper: KS AZ JIS YG.



## References

- Bowen MF (1991) The Sensory Physiology of Host-Seeking Behavior in Mosquitoes. *Annual Review of Entomology* 36: 139–158.
- Bretscher AJ, Busch KE, de Bono M (2008) A carbon dioxide avoidance behavior is integrated with responses to ambient oxygen and food in *Caenorhabditis elegans*. *Proceedings of the National Academy of Sciences* 105: 8044–8049.
- Carrillo M, Guillermin M, Rengarajan S, Okubo R, Hallem E (2013) O<sub>2</sub>-Sensing Neurons Control CO<sub>2</sub> Response in *C. elegans*. *The Journal of Neuroscience: the official journal of the Society for Neuroscience* 33: 9675–9683.
- Hallem EA, Sternberg PW (2008) Acute carbon dioxide avoidance in *Caenorhabditis elegans*. *Proceedings of the National Academy of Sciences* 105: 8038–8043.
- Suh GSB, Wong AM, Hergarden AC, Wang JW, Simon AF, et al. (2004) A single population of olfactory sensory neurons mediates an innate avoidance behaviour in *Drosophila*. *Nature* 431: 854–859.
- Briva A, Vadász I, Lecuona E, Welch LC, Chen J, et al. (2007) High CO<sub>2</sub> Levels Impair Alveolar Epithelial Function Independently of pH. *PLoS ONE* 2: e1238.
- Vadász I, Dada LA, Briva A, Trejo HE, Welch LC, et al. (2008) AMP-activated protein kinase regulates CO<sub>2</sub>-induced alveolar epithelial dysfunction in rats and human cells by promoting Na,K-ATPase endocytosis. *The Journal of Clinical Investigation* 118: 752–762.
- Vohwinkel CU, Lecuona E, Sun H, Sommer N, Vadász I, et al. (2011) Elevated CO<sub>2</sub> Levels Cause Mitochondrial Dysfunction and Impair Cell Proliferation. *Journal of Biological Chemistry* 286: 37067–37076.
- Lecuona E, Sun H, Chen J, Trejo HE, Baker MA, et al. (2013) Protein kinase A- $\alpha$  regulates Na,K-ATPase endocytosis in alveolar epithelial cells exposed to high CO<sub>2</sub> concentrations. *Am J Respir Cell Mol Biol* 48: 626–634.
- Vadász I, Dada LA, Briva A, Helenius IT, Sharabi K, et al. (2012) Evolutionary conserved role of c-Jun-N-terminal kinase in CO<sub>2</sub>-induced epithelial dysfunction. *PLoS ONE* 7: e46696.
- Cummins EP, Oliver KM, Lenihan CR, Fitzpatrick SF, Bruning U, et al. (2010) NF- $\kappa$ B Links CO<sub>2</sub> Sensing to Innate Immunity and Inflammation in Mammalian Cells. *The Journal of Immunology* 185: 4439–4445.
- Helenius IT, Krupinski T, Turnbull DW, Gruenbaum Y, Silverman N, et al. (2009) Elevated CO<sub>2</sub> suppresses specific *Drosophila* innate immune responses and resistance to bacterial infection. *Proceedings of the National Academy of Sciences* 106: 18710–18715.
- Oliver KM, Lenihan CR, Bruning U, Cheong A, Laffey JG, et al. (2012) Hypercapnia Induces Cleavage and Nuclear Localization of RelB Protein, Giving Insight into CO<sub>2</sub> Sensing and Signaling. *Journal of Biological Chemistry* 287: 14004–14011.
- Wang N, Gates KL, Trejo H, Favoretto S, Schleimer RP, et al. (2010) Elevated CO<sub>2</sub> selectively inhibits interleukin-6 and tumor necrosis factor expression and decreases phagocytosis in the macrophage. *The FASEB Journal* 24: 2178–2190.
- Chen Y, Cann MJ, Litvin TN, Iourgenko V, Sinclair ML, et al. (2000) Soluble adenylyl cyclase as an evolutionarily conserved bicarbonate sensor. *Science* 289: 625–628.
- Cook ZC, Gray MA, Cann MJ (2012) Elevated Carbon Dioxide Blunts Mammalian cAMP Signaling Dependent on Inositol 1,4,5-Triphosphate Receptor-mediated Ca<sup>2+</sup> Release. *Journal of Biological Chemistry* 287: 26291–26301.
- Townsend PD, Holliday PM, Fenyk S, Hess KC, Gray MA, et al. (2009) Stimulation of Mammalian G-protein-responsive Adenylyl Cyclases by Carbon Dioxide. *Journal of Biological Chemistry* 284: 784–791.
- Gates KL, Howell HA, Nair A, Vohwinkel CU, Welch LC, et al. (2013) Hypercapnia impairs lung neutrophil function and increases mortality in murine *Pseudomonas pneumonia*. *Am J Respir Cell Mol Biol* 49: 821–828.
- Sharabi K, Lecuona E, Helenius IT, Beitel GJ, Sznajder JI, et al. (2009) Sensing, physiological effects and molecular response to elevated CO<sub>2</sub> levels in eukaryotes. *Journal of Cellular and Molecular Medicine* 13: 4304–4318.
- Brandt JP, Aziz-Zaman S, Juozaityte V, Martinez-Velazquez LA, Petersen JG, et al. (2012) A Single Gene Target of an ETS-Family Transcription Factor Determines Neuronal CO<sub>2</sub> Chemosensitivity. *PLoS ONE* 7: e34014.
- Guillermin ML, Castelletto ML, Hallem EA (2011) Differentiation of Carbon Dioxide-Sensing Neurons in *Caenorhabditis elegans* Requires the ETS-5 Transcription Factor. *Genetics* 189: 1327–1339.
- Hallem EA, Spencer WC, McWhirter RD, Zeller G, Henz SR, et al. (2011) Receptor-type guanylate cyclase is required for carbon dioxide sensation by *Caenorhabditis elegans*. *Proceedings of the National Academy of Sciences* 108: 254–259.
- Bretscher AJ, Kodama-Namba E, Busch KE, Murphy RJ, Soltesz Z, et al. (2011) Temperature, oxygen, and salt-sensing neurons in *C. elegans* are carbon dioxide sensors that control avoidance behavior. *Neuron* 69: 1099–1113.
- Sharabi K, Hurwitz A, Simon AJ, Beitel GJ, Morimoto RI, et al. (2009) Elevated CO<sub>2</sub> levels affect development, motility, and fertility and extend life span in *Caenorhabditis elegans*. *Proceedings of the National Academy of Sciences* 106: 4024–4029.
- Smith ES, Martinez-Velazquez L, Ringstad N (2013) A chemoreceptor that detects molecular carbon dioxide. *J Biol Chem* 288: 37071–37081.
- Zimmer M, Gray JM, Pokala N, Chang AJ, Karow DS, et al. (2009) Neurons Detect Increases and Decreases in Oxygen Levels Using Distinct Guanylate Cyclases. *Neuron* 61: 865–879.
- Doitsidou M, Poole RJ, Sarin S, Bigelow H, Hobert O (2010) *C. elegans* Mutant Identification with a One-Step Whole-Genome-Sequencing and SNP Mapping Strategy. *PLoS ONE* 5: e15435.
- Ailion M, Thomas JH (2003) Isolation and Characterization of High-Temperature-Induced Dauer Formation Mutants in *Caenorhabditis elegans*. *Genetics* 165: 127–144.
- Burgoyne RD, Morgan A (2003) Secretory Granule Exocytosis. *Physiological Reviews* 83: 581–632.
- Mesa R, Luo S, Hoover CM, Miller K, Minniti A, et al. (2011) HID-1, a new component of the peptidergic signaling pathway. *Genetics* 187: 467–483.
- Wang L, Zhan Y, Song E, Yu Y, Jiu Y, et al. (2011) HID-1 is a peripheral membrane protein primarily associated with the medial- and trans- Golgi apparatus. *Protein Cell* 2: 74–85.
- Yu Y, Wang L, Jiu Y, Zhan Y, Liu L, et al. (2011) HID-1 is a novel player in the regulation of neuropeptide sorting. *Biochem J* 434: 383–390.
- Hammarlund M, Watanabe S, Schuske K, Jorgensen EM (2008) CAPS and syntaxin dock dense core vesicles to the plasma membrane in neurons. *The Journal of Cell Biology* 180: 483–491.
- Jacob TC, Kaplan JM (2003) The EGL-21 Carboxypeptidase E Facilitates Acetylcholine Release at *Caenorhabditis elegans* Neuromuscular Junctions. *The Journal of Neuroscience* 23: 2122–2130.
- Richmond JE, Davis WS, Jorgensen EM (1999) UNC-13 is required for synaptic vesicle fusion in *C. elegans*. *Nat Neurosci* 2: 959–964.
- Richmond JE, Weimer RM, Jorgensen EM (2001) An open form of syntaxin bypasses the requirement for UNC-13 in vesicle priming. *Nature* 412: 338–341.
- Gracheva EO, Hadwiger G, Nonet ML, Richmond JE (2008) Direct interactions between *C. elegans* RAB-3 and Rim provide a mechanism to target vesicles to the presynaptic density. *Neurosci Lett* 444: 137–142.
- Nathoo AN, Moeller RA, Westlund BA, Hart AC (2001) Identification of neuropeptide-like protein gene families in *Caenorhabditis elegans* and other species. *Proceedings of the National Academy of Sciences* 98: 14000–14005.
- Henderson ST, Johnson TE (2006) *daf-16* protects the nematode *Caenorhabditis elegans* during food deprivation. *J Gerontol A Biol Sci Med Sci* 61: 444–460.
- Kimura KD, Riddle DL, Ruvkun G (2011) The *C. elegans* DAF-2 insulin-like receptor is abundantly expressed in the nervous system and regulated by nutritional status. *Cold Spring Harb Symp Quant Biol* 76: 113–120.
- Holden-Dye L, Walker RJ (2013) The roles of neuropeptides in *Caenorhabditis elegans* including their importance in the regulation of feeding and metabolism. *Protein Pept Lett* 20: 636–646.
- Avery L, Bargmann CI, Horvitz HR (1993) The *Caenorhabditis elegans* unc-31 gene affects multiple nervous system-controlled functions. *Genetics* 134: 455–464.
- Sun L, Wang H, Hu J, Han J, Matsumami H, et al. (2009) Guanylyl cyclase-D in the olfactory CO<sub>2</sub> neurons is activated by bicarbonate. *Proceedings of the National Academy of Sciences* 106: 2041–2046.
- Klengel T, Liang WJ, Chaloupka J, Ruoff C, Schroppe K, et al. (2005) Fungal adenylyl cyclase integrates CO<sub>2</sub> sensing with cAMP signaling and virulence. *Curr Biol* 15: 2021–2026.
- Mogensen EG, Janbon G, Chaloupka J, Steegborn C, Fu MS, et al. (2006) *Cryptococcus neoformans* Senses CO<sub>2</sub> through the Carbonic Anhydrase Can2 and the Adenylyl Cyclase Cae1. *Eukaryotic Cell* 5: 103–111.
- Brenner S (1974) The Genetics of *Caenorhabditis elegans*. *Genetics* 77: 71–94.
- Mello CC, Kramer JM, Stinchcomb D, Ambros V (1991) Efficient gene transfer in *C. elegans*: extrachromosomal maintenance and integration of transforming sequences. *EMBO J* 10: 3959–3970.
