# Supplementary material for: The Response to High CO2 Levels Requires the Neuropeptide Secretion Component HID-1 to Promote Pumping Inhibition
Source: PubMed Central journal article supplement (PMC4125093; doi:10.1371/journal.pgen.1004529), 2014-08-07

Figure S4

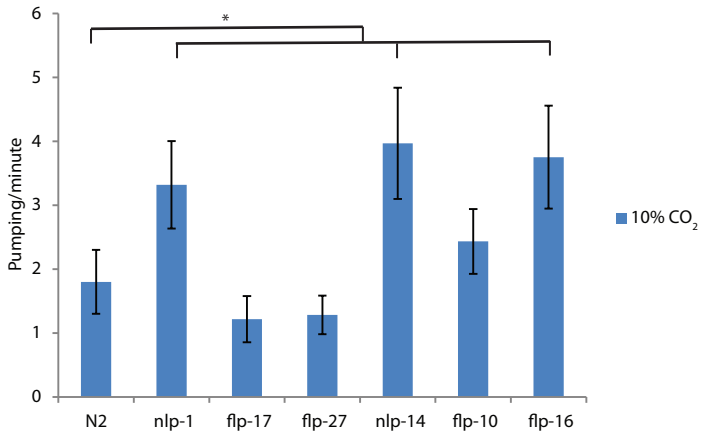

Supplement: pgen.1004529.s004.pdf [file pgen.1004529.s004.pdf]
